# Supplementary material
Source: PubMed Central journal article supplement (PMC3272303)
Supplement: NIHMS116106-supplement-Suppl_Figure_1.pdf [file NIHMS116106-supplement-Suppl_Figure_1.pdf]

A767\_V769dupASV

D770\_N771insNPG

H773\_V774insH

|                   | A767_V769dupASV | D770_N771insNPG | H773_V774insH |
|-------------------|-----------------|-----------------|---------------|
| <b>Erlotinib</b>  | >3,000nM        | 1545nM          | >5,000nM      |
| <b>CL-387,785</b> | 408nM           | 38nM            | 2,262nM       |
| <b>17-DMAG</b>    | 123nM           | 41nM            | 38nM          |

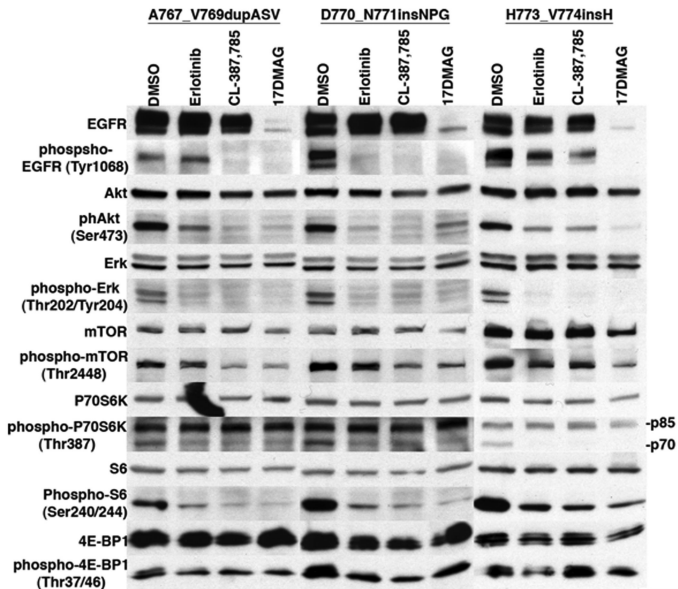

Figure S1
