# Supplementary material
Source: PubMed Central journal article supplement (PMC3272303)

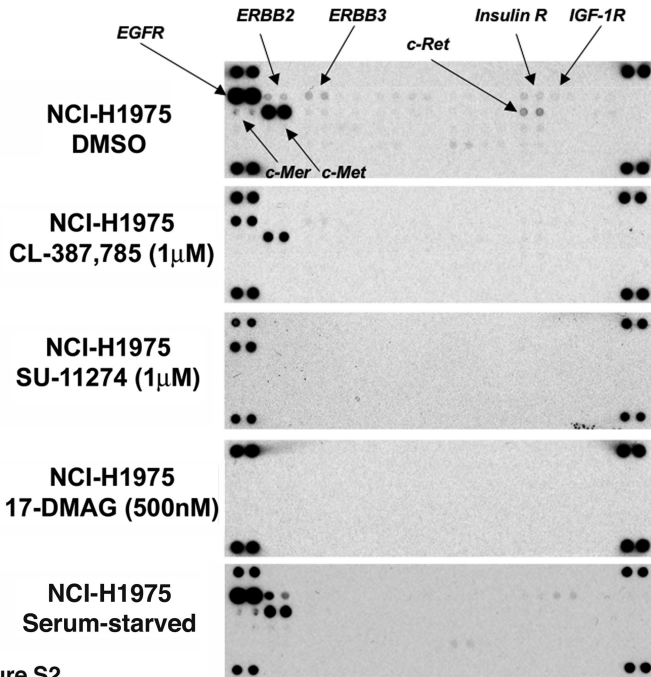

Figure S2

Supplement: NIHMS116106-supplement-Suppl_Figure_2.pdf [file NIHMS116106-supplement-Suppl_Figure_2.pdf]

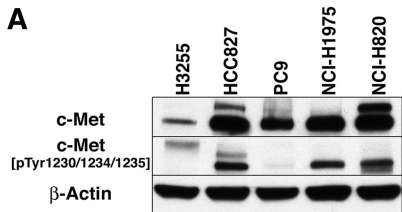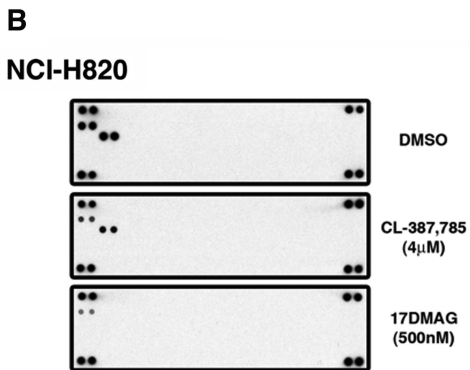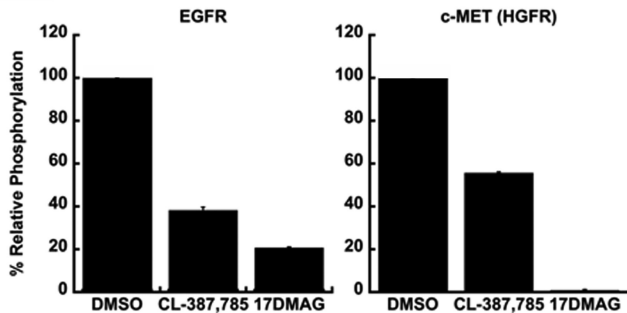

Figure S3

Supplement: NIHMS116106-supplement-Suppl_Figure_3.pdf [file NIHMS116106-supplement-Suppl_Figure_3.pdf]

**A**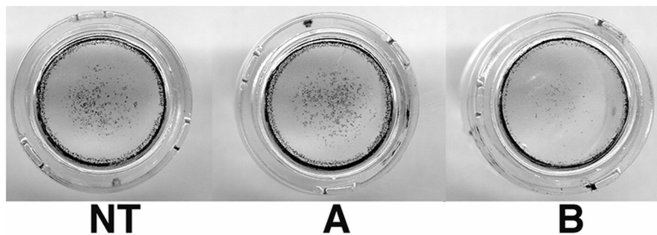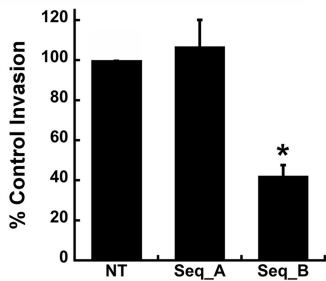**B**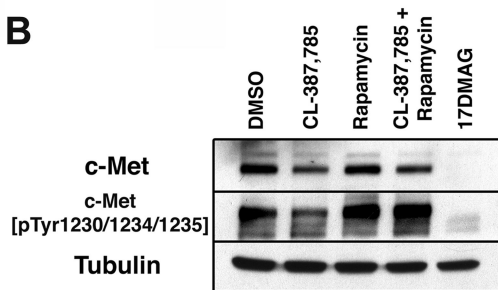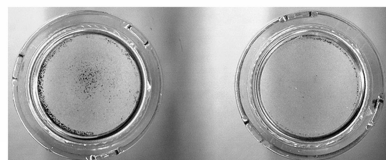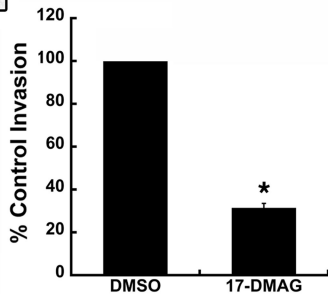**Figure S4**

Supplement: NIHMS116106-supplement-Suppl_Figure_4.pdf [file NIHMS116106-supplement-Suppl_Figure_4.pdf]

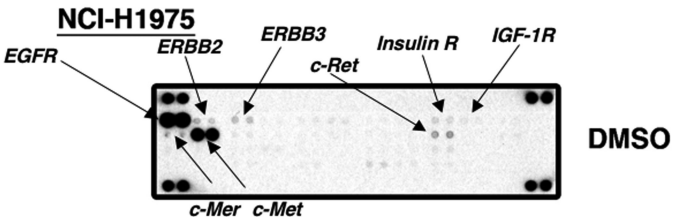

**NCI-H1975CLR**

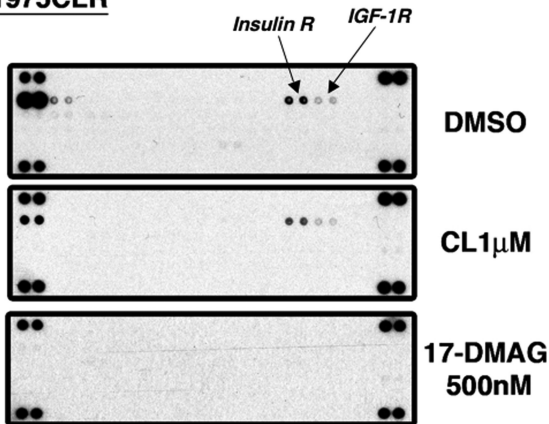

Figure S5

Supplement: NIHMS116106-supplement-Suppl_Figure_5.pdf [file NIHMS116106-supplement-Suppl_Figure_5.pdf]

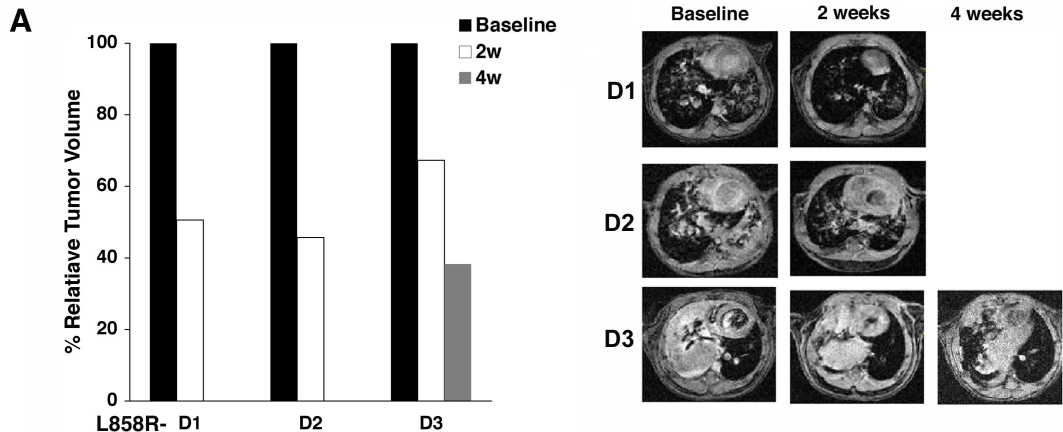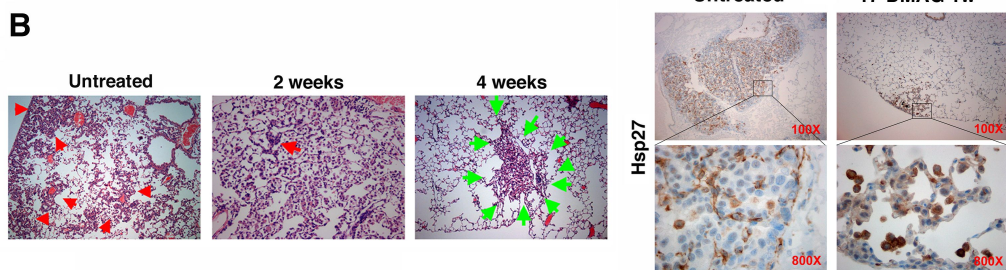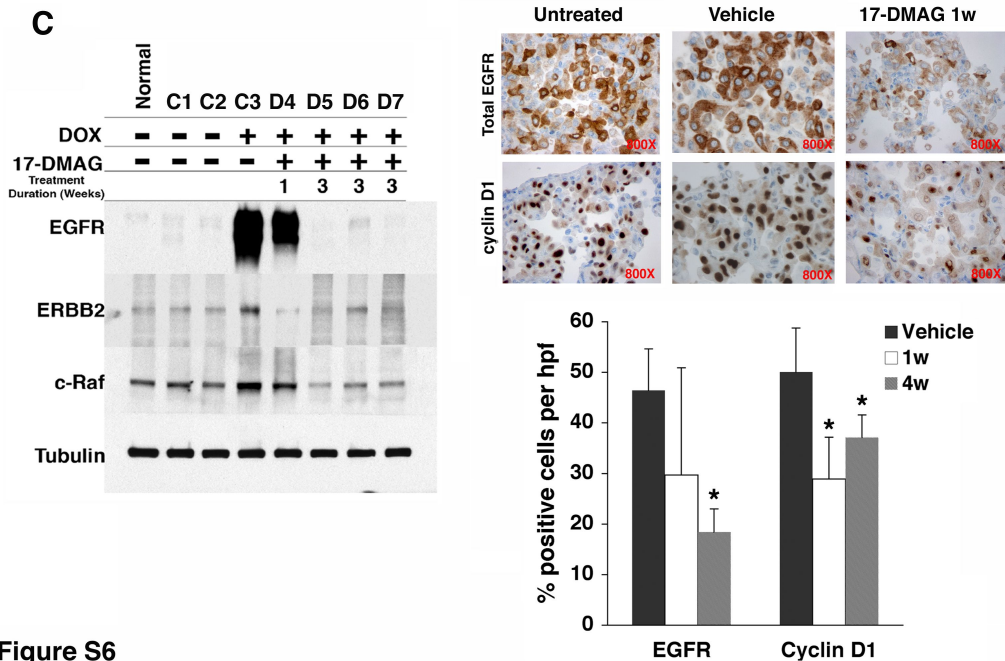

Figure S6

Supplement: NIHMS116106-supplement-Suppl_Figure_6.pdf [file NIHMS116106-supplement-Suppl_Figure_6.pdf]

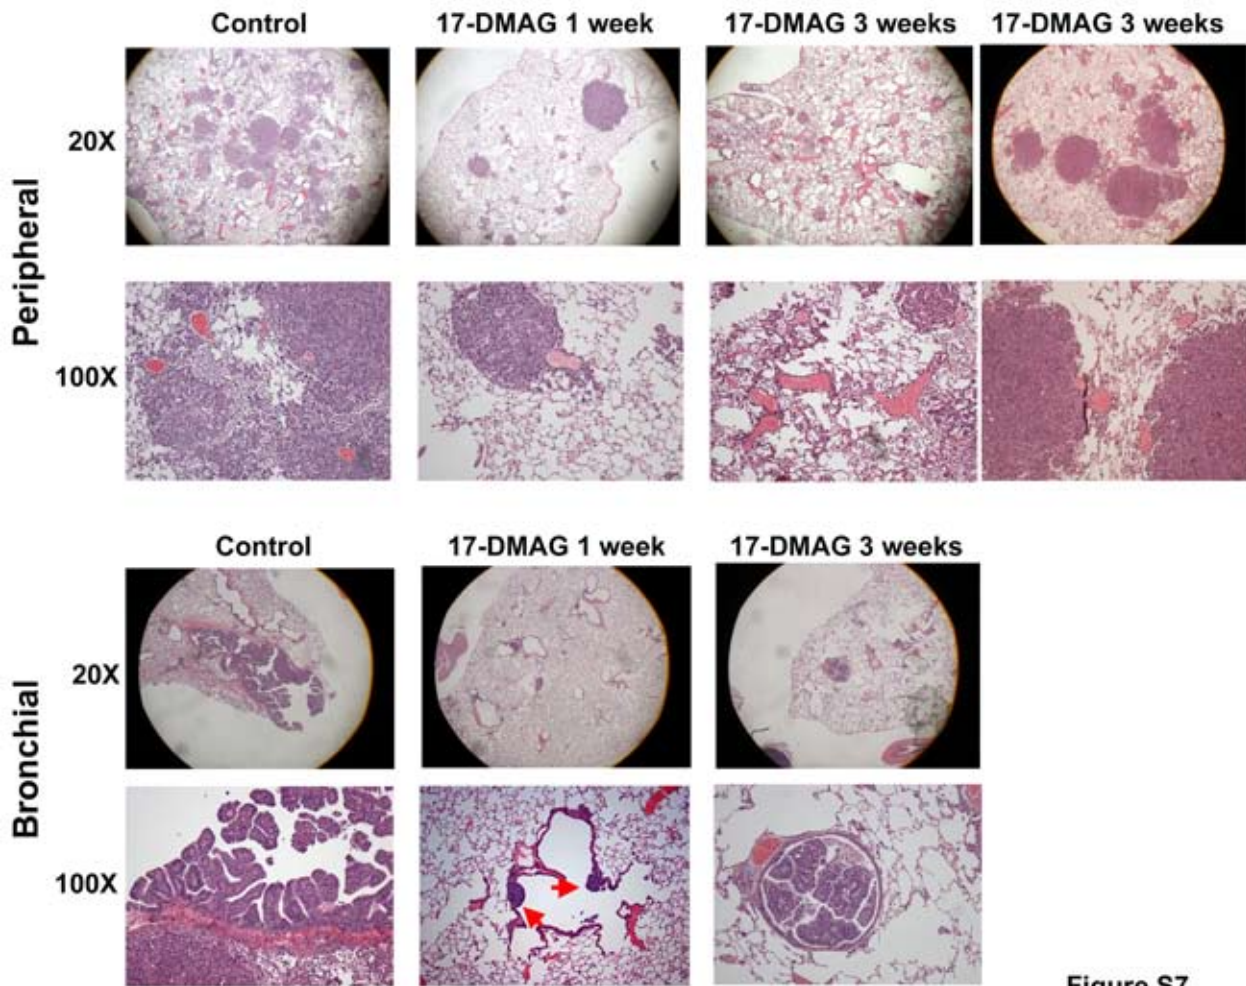

Figure S7

Supplement: NIHMS116106-supplement-Suppl_Figure_7.pdf [file NIHMS116106-supplement-Suppl_Figure_7.pdf]

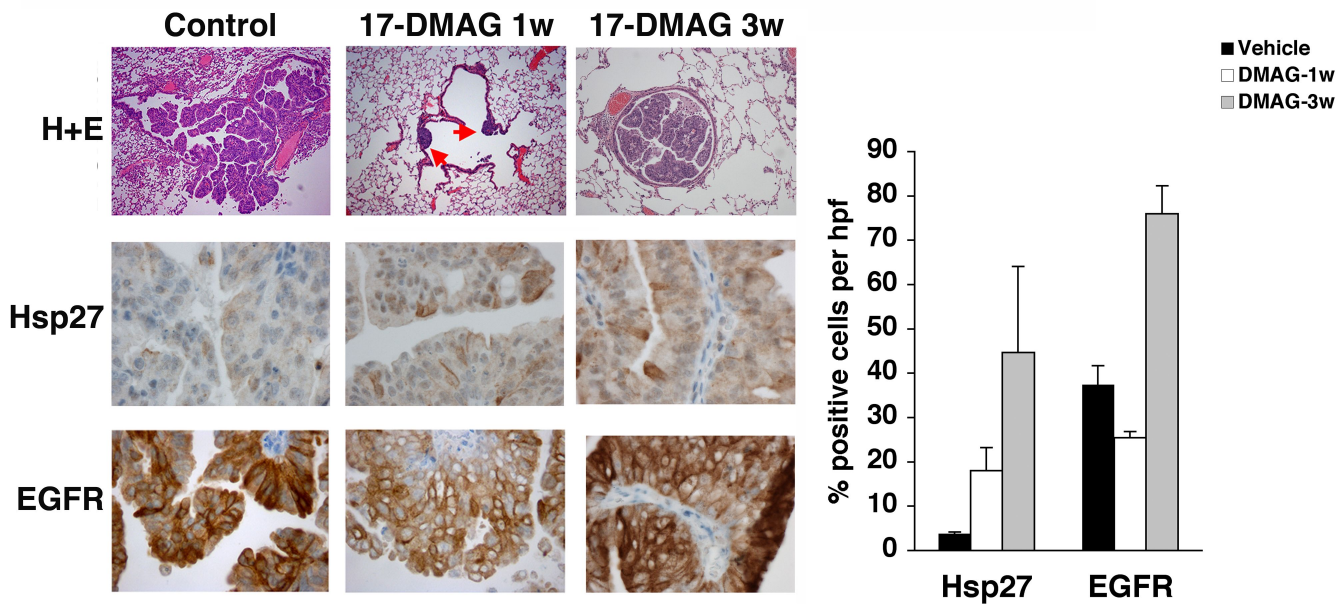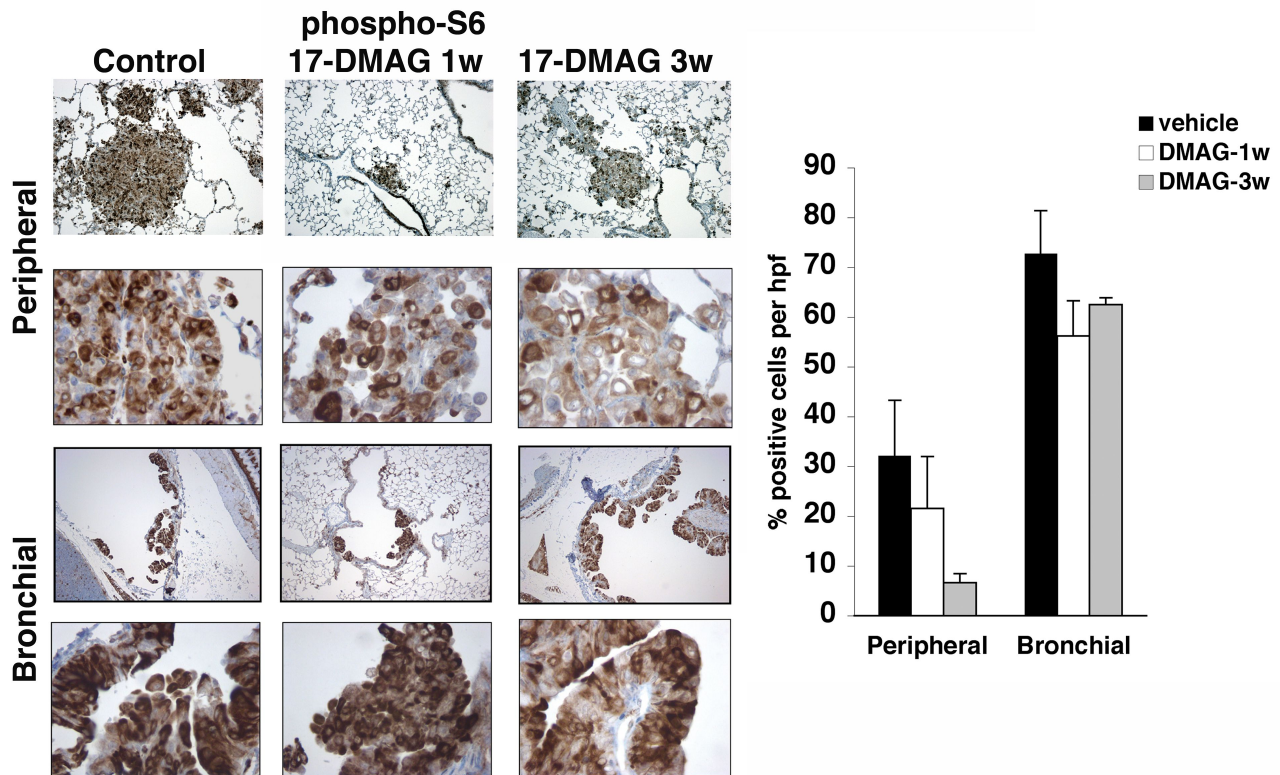

**Figure S8**

Supplement: NIHMS116106-supplement-Suppl_Figure_8.pdf [file NIHMS116106-supplement-Suppl_Figure_8.pdf]
